# Supplementary material for: Horseradish peroxidase assisted “signal-on” chemiluminescence aptasensor for sensitive detection of aflatoxin B1
Source: Royal Society of Chemistry journal article supplement (doi:10.1039/d6ra00359a), 2026-05-05
Supplement: d6ra00359a1.pdf [file d6ra00359a1.pdf]

## Supplementary Material

# Horseradish Peroxidase Assisted “Signal-on” Chemiluminescence Aptasensor for Sensitive Detection of Aflatoxin B1

**Linlin Sun<sup>\*a,b</sup>, Fengyi Miao<sup>b</sup>, Wenjuan Wan<sup>b</sup>, Lingchen Wang<sup>a</sup> and Chuan Dong<sup>a</sup>**

a. Institute of Environmental Science, Shanxi University, Taiyuan 030006, China.

b. Shanxi Higher Education Institutions of Science and Technology Innovation Plan Platform, Laboratory of Environmental Factors and Population Health, College of Public Health, Changzhi Medical College, Changzhi 046000, China.

\* Corresponding author

E-mail: sunlinlin@czmc.edu.cn

**Table S1** Sequences of DNA oligonucleotides

| Name        | Sequences (5' to 3')                     |
|-------------|------------------------------------------|
| AF-Apt      | TGGGCACGTGTTGTCTCTCTGTGTCTCGTGCCCTTTTTTT |
| C11-3BioTEG | ACACGTGCCCA                              |
| C12-3BioTEG | AACACGTGCCCA                             |
| C13-3BioTEG | CAACACGTGCCCA                            |
| C14-3BioTEG | ACAACACGTGCCCA                           |
| C15-3BioTEG | GACAACACGTGCCCA                          |
| C16-3BioTEG | AGACAACACGTGCCCA                         |
| C17-3BioTEG | GAGACAACACGTGCCCA                        |
| C18-3BioTEG | AGAGACAACACGTGCCCA                       |
| C19-3BioTEG | GAGAGACAACACGTGCCCA                      |
| C20-3BioTEG | AGAGAGACAACACGTGCCCA                     |

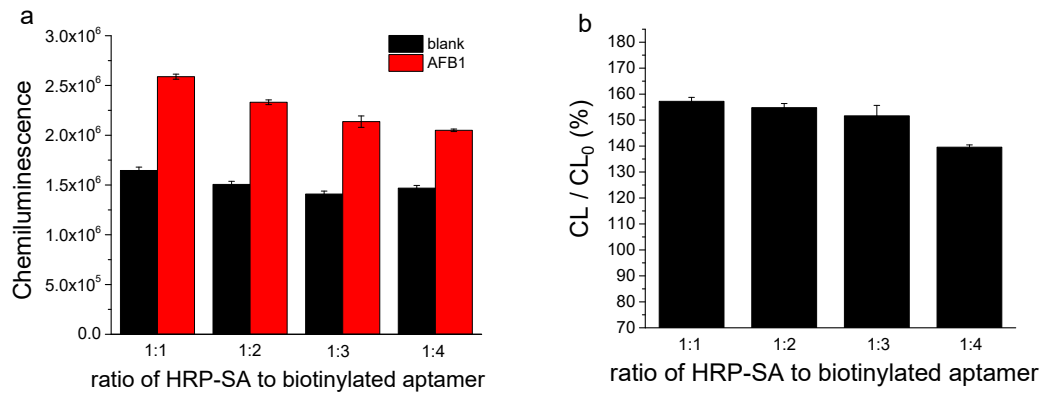

**Fig.S1** Effect of the molar ratio of HRP-SA conjugate to biotinylated aptamer on AFB1 detection by this HRP assisted “signal-on” chemiluminescence aptasensor. (a) Chemiluminescence signals corresponding to blank sample and AFB1 sample (10 nM). (b) Change of chemiluminescence signal caused by AFB1-binding. CL/CL<sub>0</sub> (%) means the percentage of the signal value corresponding to AFB1 sample (CL) to that of blank sample (CL<sub>0</sub>).

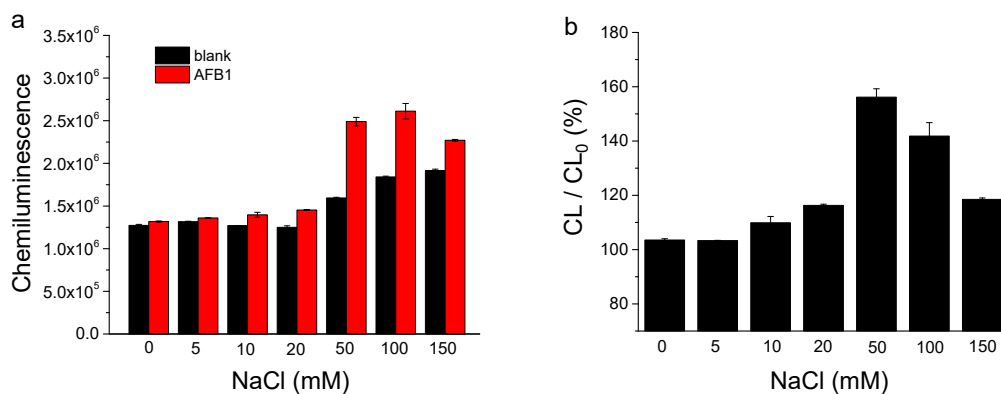

**Fig.S2** Effect of NaCl concentration on AFB1 detection by this HRP assisted “signal-on” chemiluminescence aptasensor. (a) Chemiluminescence signals corresponding to blank sample and AFB1 sample (10 nM). (b) Change of chemiluminescence signal caused by AFB1-binding. CL/CL<sub>0</sub> (%) means the percentage of the signal value corresponding to AFB1 sample (CL) to that of blank sample (CL<sub>0</sub>). The buffer solution contained 10 mM HEPES (pH 7.5), 10 mM MgCl<sub>2</sub>, 0.1% Tween-20 and various concentrations of NaCl.
